# Supplementary material for: Dynamic experiment on the treatment of acidic chromium-containing wastewater by lignite loaded nano FeS
Source: Royal Society of Chemistry journal article supplement (doi:10.1039/d1ra08892k), 2022-01-01
Supplement: d1ra08892k1.pdf [file d1ra08892k1.pdf]

Table of peak positions of functional groups

| Functional group            | Peak /cm <sup>-1</sup> | Peak position attribution                      | Proportion of peak area before nFeS-lignite reaction | Proportion of peak area after nFeS-lignite reaction | Proportion of peak area before lignite reaction | Proportion of peak area after lignite reaction |
|-----------------------------|------------------------|------------------------------------------------|------------------------------------------------------|-----------------------------------------------------|-------------------------------------------------|------------------------------------------------|
| Aromatic hydrocarbon        | 900                    | Benzene ring disubstitution                    | 72.16                                                | 61.64                                               | 72.26                                           | 54.66                                          |
|                             | ~                      | Benzene ring trisubstitution                   | 17.26                                                | 13.97                                               | 23.52                                           | 40.7                                           |
|                             | 700                    | Benzene ring tetra substitution                | 10.58                                                | 24.62                                               | 4.22                                            | 4.65                                           |
| Oxygenated functional group |                        | Alkyl ethers                                   | 6.15                                                 | 1.59                                                | 2.81                                            | 2.76                                           |
|                             |                        | C-O phenols, ethers                            | 28.81                                                | 21.51                                               | 21.41                                           | 22.39                                          |
|                             | 1800                   | C-O in aryl ethers                             | 6.51                                                 | 8.41                                                | 8.73                                            | 8.75                                           |
|                             | ~                      | Aymmetric Ar-CH <sub>3</sub>                   | 8.86                                                 | 11.76                                               | 11.9                                            | 11.95                                          |
|                             | 1000                   | Asymmetric -CH <sub>3</sub> , -CH <sub>2</sub> | 8.22                                                 | 9.91                                                | 9.25                                            | 9.7                                            |
| Aliphatic hydrocarbon       |                        | Aromatic C=C                                   | 34.43                                                | 39.02                                               | 38.82                                           | 36.34                                          |
|                             |                        | -COOH                                          | 7.02                                                 | 7.79                                                | 7.09                                            | 8.10                                           |
|                             | 3000                   | Symmetric R <sub>2</sub> CH <sub>2</sub>       | 19.09                                                | 34.23                                               | 23.81                                           | 28.72                                          |
|                             | ~                      | R <sub>3</sub> CH                              | 35.45                                                | 22.6                                                | 18.21                                           | 19.24                                          |
|                             | 2800                   | Asymmetric R <sub>2</sub> CH <sub>2</sub>      | 31.66                                                | 29.86                                               | 42.41                                           | 36.88                                          |
| Hydroxyl                    |                        | Asymmetric RCH <sub>3</sub>                    | 13.81                                                | 13.32                                               | 15.58                                           | 15.16                                          |
|                             | 3600                   | OH-N                                           | 6.89                                                 | 6.18                                                | 9.8                                             | 14.14                                          |
|                             | ~                      | Ring hydroxyl                                  | 16.13                                                | 24.86                                               | 19.8                                            | 25.57                                          |
|                             | 3000                   | Phenol OH                                      | 48.73                                                | 35.94                                               | 46.83                                           | 34.1                                           |
|                             |                        | OH-π                                           | 28.26                                                | 33.02                                               | 23.57                                           | 26.2                                           |
